# Supplementary material for: Neurofilament light chain level in plasma extracellular vesicles and Parkinson’s disease
Source: PubMed Central journal article supplement — Ther Adv Neurol Disord. 2020 Dec 7;13:1756286420975917. doi: 10.1177/1756286420975917 (PMC7724268; doi:10.1177/1756286420975917), 2020-12-07

## Supplementary Information

**Supplementary Table S1.** Multivariable regression model for the correlations between disease duration with plasma extracellular vesicle (EV) neurofilament light chain (NfL) adjusted for age in Parkinson's disease (PD) patients.

|               | $\beta$     | <i>p</i> -value |
|---------------|-------------|-----------------|
| Age           | 0.044±0.029 | 0.14            |
| Plasma EV NfL | 0.113±0.066 | 0.09            |

\* $\beta$ , coefficient estimate

**Supplementary Table S2.** Multivariable regression model for the correlations between akinetic rigidity score with plasma extracellular vesicle (EV) neurofilament light chain (NfL) adjusted for age in Parkinson's disease (PD) patients.

|               | $\beta$     | <i>p</i> -value |
|---------------|-------------|-----------------|
| Age           | 0.009±0.005 | 0.05            |
| Plasma EV NfL | 0.021±0.011 | 0.05            |

\* $\beta$ , coefficient estimate

**Supplementary Table S3** Analysis of covariance (ANCOVA) with Dunnett's post-hoc analysis to compare the Unified Parkinson's Disease Rating Scale (UPDRS)-III and akinetic rigidity score according the plasma extracellular vesicle (EV) neurofilament light chain (NfL) quartile subgroup after the adjustment of age, sex, and disease duration in Parkinson's disease (PD) patients.

| Plasma EV NfL | UPDRS-III   | <i>p</i> value | Akinetic rigidity score | <i>p</i> value |
|---------------|-------------|----------------|-------------------------|----------------|
| Q1            | 18.38±9.74  | (ref)          | 0.76±0.34               | (ref)          |
| Q2            | 23.71±10.67 | 0.092          | 1.00±0.42               | 0.080          |
| Q3            | 24.61±7.72  | 0.086          | 1.03±0.41               | 0.075          |
| Q4            | 23.30±10.26 | 0.115          | 1.03±0.49               | 0.057          |

**Supplementary Table S4** One-way analysis of variance (ANOVA) compares the plasma extracellular vesicle (EV) neurofilament light chain (NfL) quartile-stratified age and disease duration in Parkinson's disease (PD) patients. No significant difference was detected in the Dunnett's post-hoc analysis compared with Q1.

| Plasma EV NfL            | Q1         | Q2         | Q3         | Q4         | <i>p</i> for trend |
|--------------------------|------------|------------|------------|------------|--------------------|
| Age (year-old)           | 68.86±8.59 | 70.00±8.18 | 68.61±7.95 | 71.10±9.04 | 0.66               |
| Disease duration (years) | 2.62±2.37  | 2.38±3.21  | 2.51±2.10  | 3.29±2.14  | 0.55               |

Data was presented as mean± standard deviation

**Supplementary Table S5** Pearson's chi-squared test to compare the plasma extracellular vesicle (EV) neurofilament light chain (NfL) quartile-stratified sex distribution in Parkinson's disease (PD) patients.

| Plasma EV NfL | Q1 | Q2 | Q3 | Q4 | <i>p</i> -value |
|---------------|----|----|----|----|-----------------|
| Male          | 15 | 17 | 17 | 13 | 0.54            |
| Female        | 14 | 12 | 11 | 17 |                 |

**Supplementary Table S6.** Multivariable regression model for the correlations between optimal plasma extracellular vesicle (EV) neurofilament light chain (NfL) (Q1) and Unified Parkinson's Disease Rating Scale (UPDRS)-III adjusted for age, sex, and disease duration in Parkinson's disease (PD) patients.

|                                 | $\beta$     | <i>p</i> -value |
|---------------------------------|-------------|-----------------|
| Age                             | 0.746±1.797 | 0.679           |
| Sex (female as reference)       | 0.232±0.113 | 0.042           |
| Disease duration                | 0.431±0.366 | 0.242           |
| Plasma EV NfL (Q1 as reference) | 6.67±2.08   | 0.002           |

\* $\beta$ , coefficient estimate

**Supplementary Table S7.** Multivariable regression model for the correlations between optimal plasma extracellular vesicle (EV) neurofilament light chain (NfL) (Q1) and akinetic rigidity score adjusted age, sex, and disease duration in Parkinson's disease (PD) patients.

|                                    | $\beta$      | <i>p</i> -value |
|------------------------------------|--------------|-----------------|
| Age                                | 0.024±0.079  | 0.765           |
| Sex (female as reference)          | 0.0.13±0.005 | 0.014           |
| Disease duration                   | 0.014±0.016  | 0.391           |
| Plasma EV NfL<br>(Q1 as reference) | 0.277±0.092  | 0.003           |

\* $\beta$ , coefficient estimate

**Supplementary Figure 1.** The distribution of plasma extracellular vesicle (EV) neurofilament light chain (NfL) in non-PD, neurological controls and Parkinson's disease (PD) patients.

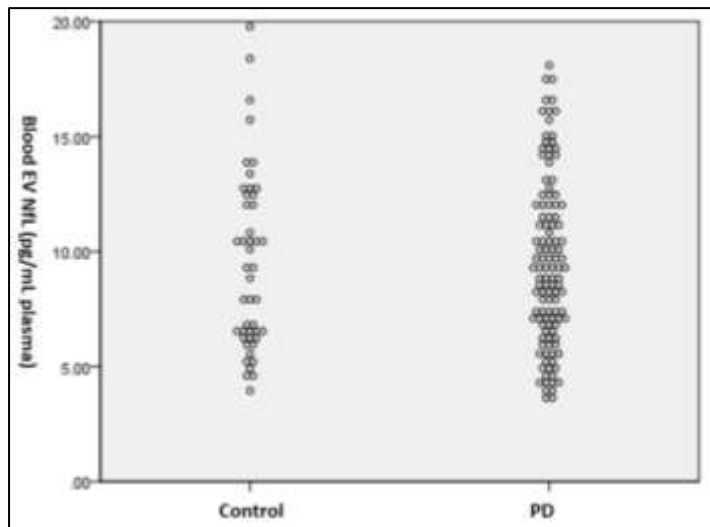

**Supplementary Figure 2.** The scatter plot of the association between plasma extracellular vesicle (EV) neurofilament light chain (NfL) with different variables, including age, disease duration, Unified Parkinson's Disease Rating Scale (UPDRS)-III scores, akinetic rigidity score, tremor score, mini-mental state examination (MMSE) and Montreal Cognitive Assessment (MoCA) among Parkinson's disease (PD) patients.  $r$ , correlation coefficient. Statistical analysis was conducted by Spearman's rank correlation.

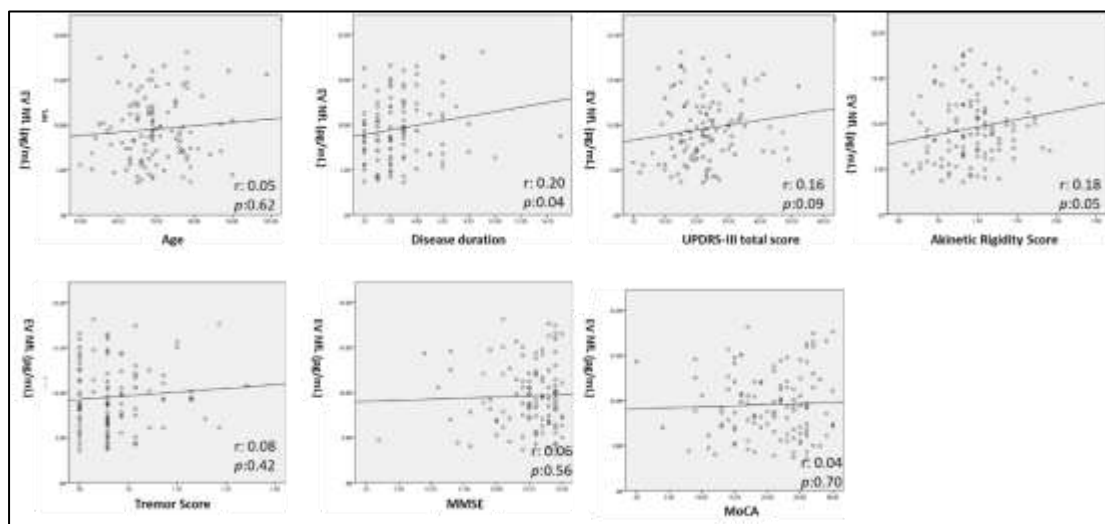

Supplement: sj-pdf-1-tan-10.1177_1756286420975917.pdf [file sj-pdf-1-tan-10.1177_1756286420975917.pdf]
